# Supplementary material
Source: Springer Nature journal article supplement (https://www.springerprofessional.de/resource/supplementary/13638_2013_845_MOESM3_ESM.pdf/11898600)
Supplement: MOESM3 [file 11898600]

a

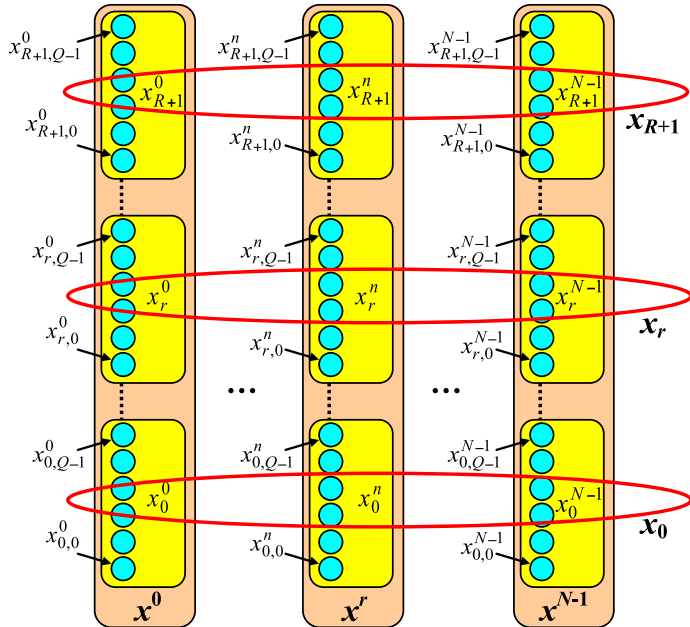

bit-level structure of MNB turbo coded block;

b

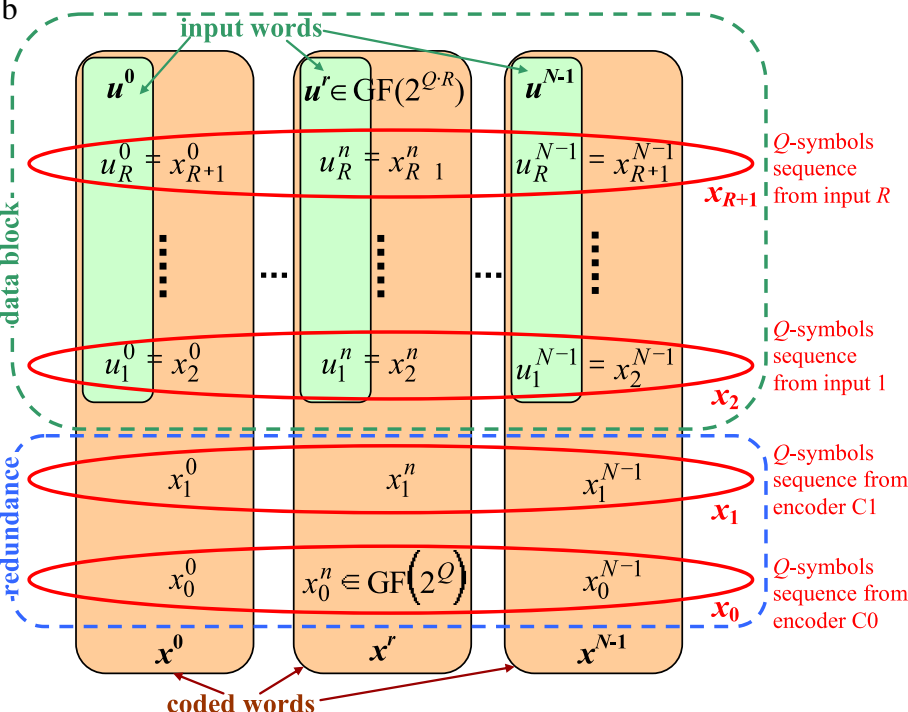 $Q$ -symbol-level structure of MNB turbo coded block;
